# Supplementary material for: The Utility of Sodium Channel Provocation in Unexplained Cardiac Arrest Survivors and Electrocardiographic Predictors of Ventricular Fibrillation Recurrence
Source: PubMed Central journal article supplement (PMC10289235; doi:10.1161/circep.122.011263), 2022-11-28
Supplement: hae-15-e011263-s001.pdf [file hae-15-e011263-s001.pdf]

**SUPPLEMENTAL MATERIAL**

**Supplementary Table I**

| <b>Characteristics</b>                          | <b>Selected SCBP+ patients</b> |
|-------------------------------------------------|--------------------------------|
|                                                 | <b>N = 15</b>                  |
| <b>Mean age at presentation (years) (SD)</b>    | 39 (12)                        |
| <b>Male % (N)</b>                               | 93 (14)                        |
| <b>Caucasian Ethnicity % (N)</b>                | 73% (11)                       |
| <b>Prior Syncope % (N)</b>                      | 7% (1)                         |
| <b>Baseline Type 2/3 ECG pattern % (N)</b>      | 33% (5)                        |
| <b>Early Repolarisation % (N)</b>               | 53% (8)                        |
| <b>Anterior Early Repolarisation % (N)</b>      | 40% (6)                        |
| <b>Inferolateral Early Repolarisation % (N)</b> | 33% (5)                        |
| <b>Global Early Repolarisation % (N)</b>        | 7% (1)                         |
| <b>Upsloping ST segment elevation % (N)</b>     | 47% (7)                        |
| <b>Downsloping ST segment elevation % (N)</b>   | 13% (2)                        |
| <b>Terminal QRS notching % (N)</b>              | 13% (2)                        |
| <b>Terminal QRS slurring % (N)</b>              | 20% (3)                        |
| <b>Mean PR interval (ms) (SD)</b>               | 175 (30)                       |
| <b>Mean QRS duration (ms) (SD)</b>              | 95 (15)                        |
| <b>Mean Inferior ST elevation (mm) (SD)</b>     | .13 (.51)                      |
| <b>Mean Lateral ST elevation (mm) (SD)</b>      | .26 (.59)                      |
| <b>Mean Anterior ST elevation (mm) (SD)</b>     | .80 (.77)                      |

Clinical and electrocardiographic characteristics of the selected unexplained cardiac arrest sodium channel blocker positive patients
